# Supplementary material for: Usability and Feasibility of Myosuit-Assisted Gait Rehabilitation Training in Neurological Patients
Source: Research Square preprint supplement (doi:10.21203/rs.3.rs-8360563/v1), 2026-02-11
Supplement: Supplementary file 1 [file c1df3d079cbe6f605f0bf9aa.docx]

# Supplement

The tables below present the semi-structured interview questions that were asked at the end of session 9 to both patients and therapists. The number of patients (and therapists) who responded "yes" or "no" to each question is also shown.

| Question Number | Patient Interview Question | Yes | No |
| --- | --- | --- | --- |
| 1 | Does the Myosuit fit your expectations? | 9 | 4 |
| 2 | Would you like to continue using the Myosuit during your inpatient stay? | 6 | 7 |
| 3 | Would you rent/buy the device for home use? Price 10000 – 12000 CHF. | 5 | 8 |
| 4 | Would you recommend the Myosuit to other patients? | 13 | 0 |
| 5 | Did you feel comfortable using the Myosuit? | 8 | 5 |

Table 1. Semi-structured patient interview questions

| Question Number | Therapist Interview Question | Yes | No |
| --- | --- | --- | --- |
| 1 | Does the Myosuit fit your expectations? | 4 | 2 |
| 2 | Would you recommend therapy with the Myosuit to other patients? | 6 | 0 |
| 3 | Would you recommend therapy with the Myosuit to other therapists? | 6 | 0 |
| 4 | Do you feel that the patient was walking comfortably with the Myosuit? | 3 | 3 |
| 5 | Does the Myosuit (with minor or major modifications) have potential for home use? | 5 | 1 |
| 6 | Did you enjoy using the device? | 6 | 0 |

Table 2. Semi-structured therapist interview questions
